# Supplementary material for: Novel bis-C60 derivative compared to other fullerene bis-adducts in high efficiency polymer photovoltaic cells
Source: Royal Society of Chemistry journal article supplement (doi:10.1039/c1jm12307f), 2011-01-01
Supplement: c1jm12307f.pdf [file c1jm12307f.pdf]

## Supplementary Information

### Novel bis-C<sub>60</sub> derivative compared to other fullerene bis-adducts in high efficiency polymer photovoltaic cells

Eszter Voroshazi, Karolien Vasseur, Barry P. Rand, Tom Aernouts, Paul Heremans, Andreas Baumann, Carsten Deibel, Andreas J. Athans, Angela J. Herring, Xiang Xue, Tom Lada, Henning Richter

#### High-pressure liquid chromatography (HPLC) of purified mono- and bis-oQDMC<sub>60</sub>

High-pressure liquid chromatography (HPLC) was conducted on an Agilent 1100 Series instrument. Column: Nacalai Tesque COSMOSIL 2-(1-pyrenyl)ethylsilica stationary phase (BuckyPrep column), 250 × 4.6 mm), mobile phase: toluene, 1 mL min<sup>-1</sup>; detection: 330 nm. The analysis report for mono-oQDMC<sub>60</sub> and bis-oQDMC<sub>60</sub> are presented below.

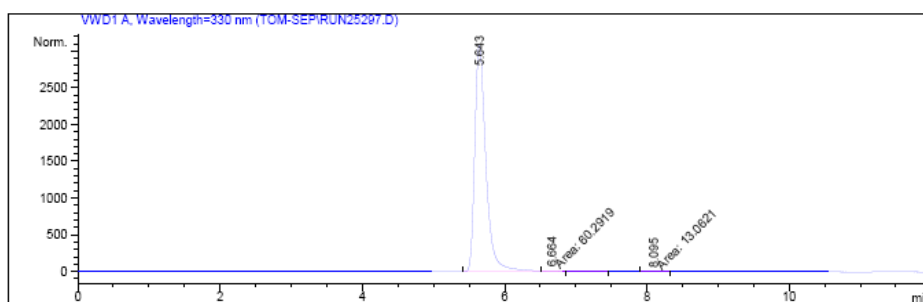

| Peak # | Ret. Time (min) | Type | Width (min) | Area (mAU*s) | Height (mAU) | Area (%) |
|--------|-----------------|------|-------------|--------------|--------------|----------|
| 1      | 5.643           | MM R | 0.1844      | 3.40120e4    | 3074.0614    | 99.7848  |
| 2      | 6.664           | MM T | 0.1610      | 60.29191     | 6.24068      | 0.1769   |
| 3      | 8.095           | MM   | 0.2458      | 13.06207     | 8.85562e-1   | 0.0383   |

Figure S1 and Table S1: Chromatogram and corresponding automatic peak fitting results for mono-oQDMC<sub>60</sub>

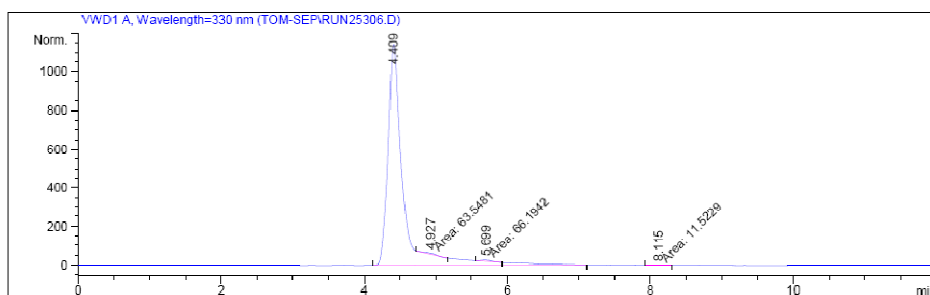

| Peak # | Ret.Time (min) | Type | Width (min) | Area (mAU*s) | Height (mAU) | Area (%) |
|--------|----------------|------|-------------|--------------|--------------|----------|
| 1      | 4.409          | MM R | 0.2456      | 1.68360e4    | 1142.52832   | 99.1679  |
| 2      | 4.927          | MM T | 0.1957      | 63.54811     | 6.27805      | 0.3743   |
| 3      | 5.699          | MM T | 0.1581      | 66.19418     | 6.97937      | 0.3899   |
| 4      | 8.115          | MM   | 0.2420      | 11.52285     | 7.93747e-1   | 0.0679   |

Figure S2 and Table S2: Chromatogram and corresponding automatic peak fitting results for bis-oQDMC<sub>60</sub>. The peak at a retention time of 4.927 min is thought to correspond to an isomer of bis-oQDMC<sub>60</sub>.

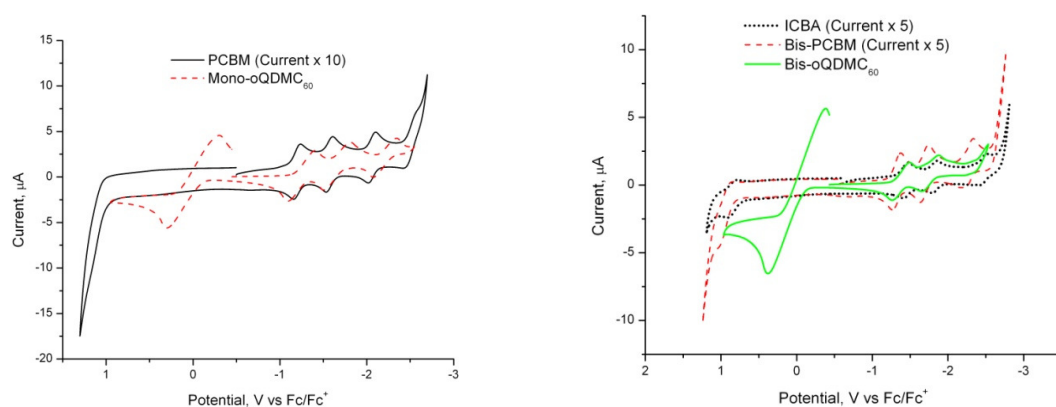

Figure S3: Cyclic voltammetry measurement of PCBM, mono- and bis-oQDMC<sub>60</sub>, bis-PCBM and ICBA.

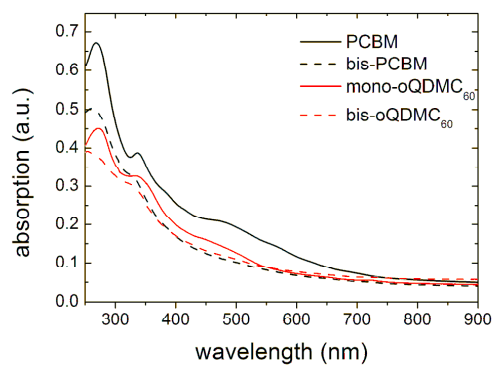

Figure S4: Absorption spectra of the various fullerenes in  $\sim 25$  nm thick solid films.

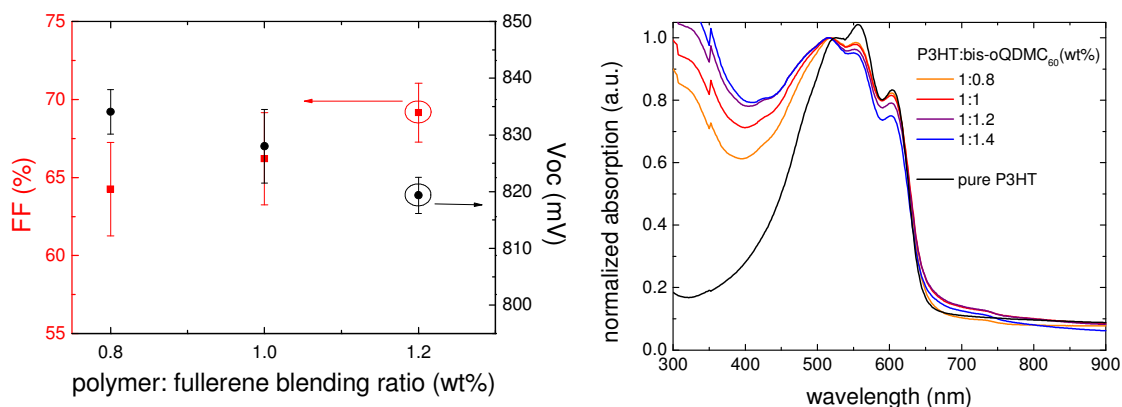

Figure S5: Impact of the polymer:fullerene ratio on photovoltaic device parameters (a) and on the optical absorption properties of the blend (b).

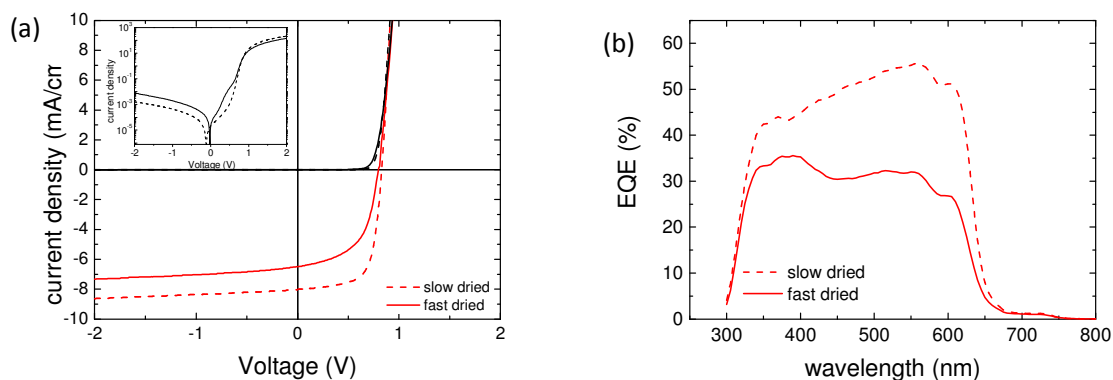

Figure S6: (a) Current density vs. voltage characteristics under 100 mW/cm<sup>2</sup> AM1.5G simulated solar illumination of devices blends of P3HT :bis-oQDMC<sub>60</sub> dried either fast or slow. (b) EQE of corresponding devices.

|                                           | processing  | Position (°) | Position (Å) | Peak height (counts) | Width (°) | Area (counts) | Crystal size (nm) |
|-------------------------------------------|-------------|--------------|--------------|----------------------|-----------|---------------|-------------------|
| Bis-oQDMC <sub>60</sub>                   | Fast drying | 5.29         | 16.69        | 127.4                | 0.25      | 34.1          | 32                |
|                                           | Slow drying | 5.27         | 16.75        | 48.7                 | 0.34      | 17.9          | 23                |
| Bis-oQDMC <sub>60</sub><br>with additives | Fast drying | 5.24         | 16.84        | 45.7                 | 0.3       | 14.8          | 27                |
|                                           | Slow drying | 5.16         | 17.11        | 48.2                 | 0.34      | 17.4          | 23                |
| P3HT:PCBM                                 | Slow drying | 5.21         | 16.94        | 85.2                 | 0.48      | 34.1          | 17                |
| P3HT                                      | Slow drying | 5.38         | 16.41        | 176.9                | 0.4       | 76.1          | 20                |

Table S3: Crystallographic parameters for P3HT:bis-oQDMC<sub>60</sub>, P3HT:PCBM blends and P3HT layers processed in varying conditions. The here tabulated values are extracted from XRR measurements presented in Fig.4 (b).

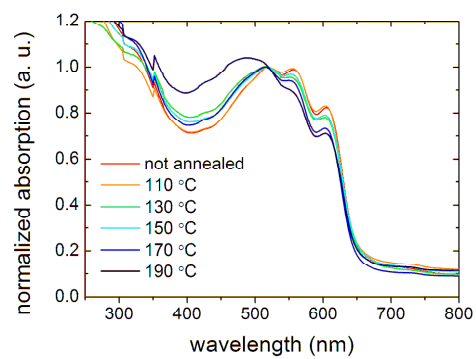

Figure S7: Normalized UV-visible spectra of P3HT:bis-oQDMC<sub>60</sub> layers annealed as varying temperature for 10 min after the solvent annealing.
